# Supplementary material
Source: PubMed Central journal article supplement (PMC5573127)
Supplement: NIHMS896784-supplement-Suppl_Figs.pdf [file NIHMS896784-supplement-Suppl_Figs.pdf]

**SUPPLEMENTARY ONLINE DATA****Regulation of adipogenesis by cytoskeleton remodelling is facilitated by acetyltransferase MEC-17-dependent acetylation of  $\alpha$ -tubulin**

Wulin YANG\*, Xiangxiang GUO\*, Shemaine THEIN\*, Feng XU†, Shigeki SUGII\*‡, Peter W. BAAS§, George K. RADDA\* and Weiping HAN\*‡||<sup>1</sup>

\*Laboratory of Metabolic Medicine, Singapore Bioimaging Consortium, Agency for Science, Technology and Research (A\*STAR), Singapore, †Singapore Institute for Clinical Sciences, A\*STAR, Singapore, ‡Cardiovascular and Metabolic Disorders Program, Duke-NUS Graduate Medical School, Singapore, §Department of Neurobiology and Anatomy, Drexel University College of Medicine, Philadelphia, PA, U.S.A., ||Department of Biochemistry, Yong Loo Lin School of Medicine, National University of Singapore, Singapore, and <sup>1</sup>Institute of Molecular and Cell Biology, Agency for Science, Technology and Research (A\*STAR), Singapore

Supplementary Figures S1–S6, and Supplementary Tables S1 and S2 are on the following pages.

<sup>1</sup> To whom correspondence should be addressed (email weiping\_han@sbic.a-star.edu.sg).

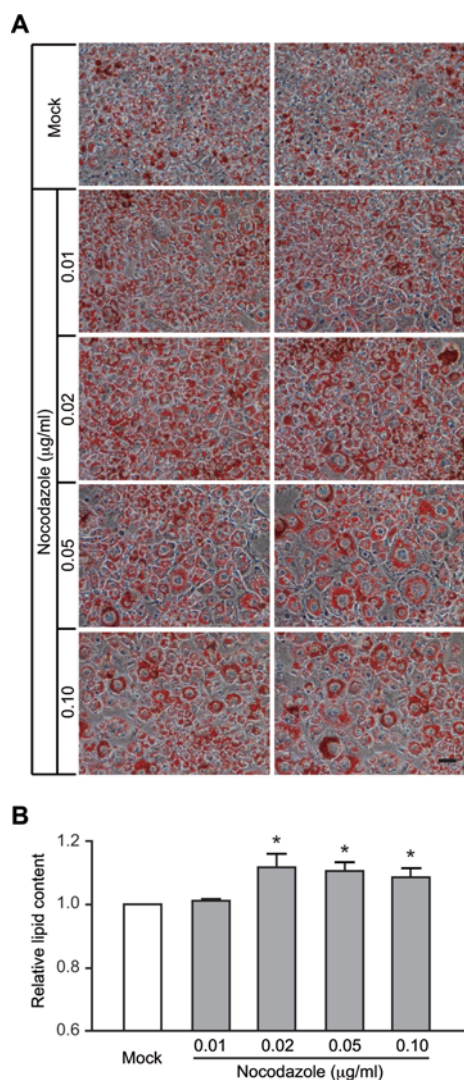

**Figure S1 Disruption of MTs by nocodazole enhances lipid accumulation during adipogenesis**

(A) Treatment with nocodazole increased triacylglycerol accumulation after adipogenic cocktail treatment. 3T3-L1 cells were treated with various concentrations of nocodazole or vehicle (Mock) for 2 h each on days 2, 4 and 6 after adipogenic cocktail treatment. Lipid accumulation was assessed by microscopy (20 $\times$ ). Two different fields are shown for each condition to illustrate reproducibility. (B) Propan-2-ol extracts of Oil-Red O from the nocodazole experiments were used to determine relative total lipid content. Values are means  $\pm$  S.E.M. ( $n = 3-4$  independent experiments). \* $P < 0.05$ . Scale bar in (C) = 50  $\mu$ m.

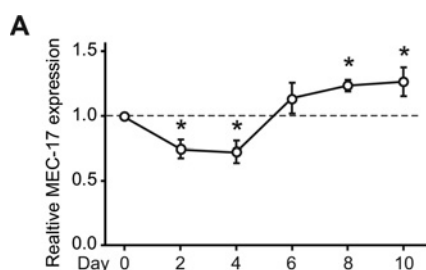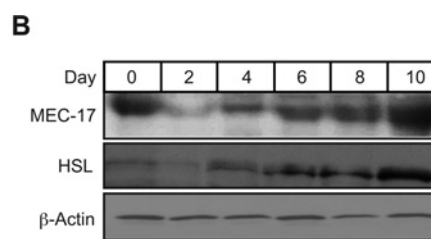

**Figure S2 Expression profile of MEC-17 in 3T3-L1 cells during adipogenesis**

(A) qPCR was used to assess mRNA levels of the acetyltransferase MEC-17 in 3T3-L1 cells at different time points after adipogenic cocktail treatment. Values are means  $\pm$  S.E.M.  $n = 3$  independent experiments, each measured in triplicate. (B) Western blots showing protein levels of MEC-17 in 3T3-L1 cells at the time points indicated after adipogenic cocktail treatment.

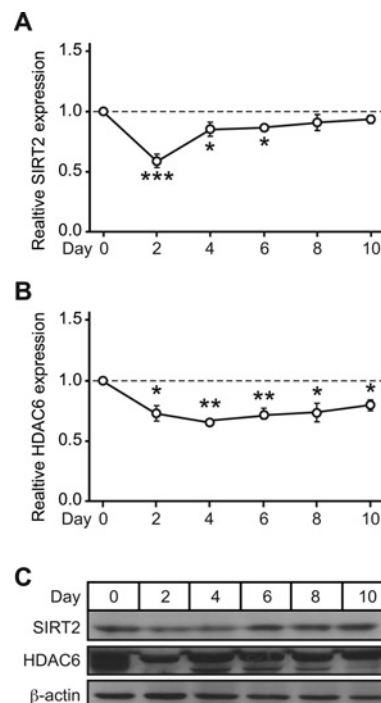

**Figure S3 Expression profile of deacetylases, SIRT2 and HDAC6 during adipogenesis**

Expression levels of SIRT2 (A) and HDAC6 (B) were evaluated in 3T3-L1 cells at the time points indicated during adipogenesis by qPCR. Values are means  $\pm$  S.E.M. ( $n = 3$  independent experiments, each measured in triplicate). (C) Western blots showing protein levels of SIRT2 and HDAC6 in 3T3-L1 cells at the time points indicated after adipogenic cocktail treatment.

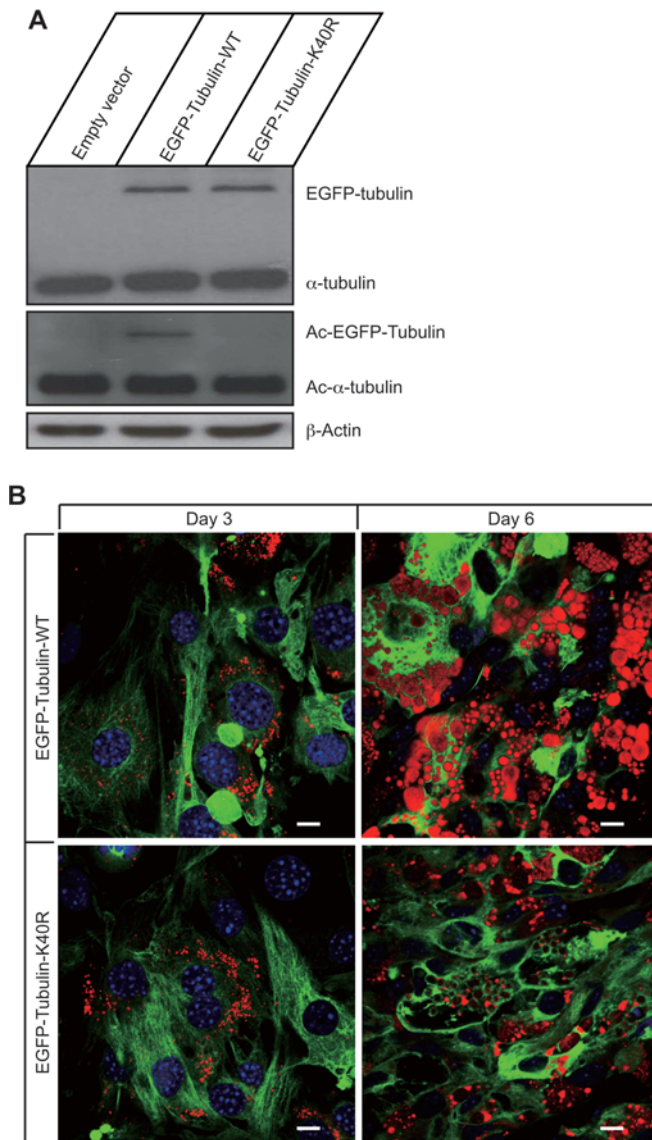

**Figure S4 Impaired morphological transition in acetylation-resistant tubulin-expressing cells during adipogenesis**

(A) Lysates from stable 3T3-L1 cells expressing EGFP- $\alpha$ -tubulin (EGFP-Tubulin-WT) or EGFP- $\alpha$ -tubulin-K40R mutant (EGFP-Tubulin-K40R) were examined by immunoblotting using anti- $\alpha$ -tubulin, anti-(acetylated  $\alpha$ -tubulin) and anti- $\beta$ -actin antibody. (B) Stable 3T3-L1 cells expressing EGFP- $\alpha$ -tubulin (EGFP-Tubulin-WT) or EGFP- $\alpha$ -tubulin-K40R (EGFP-Tubulin-K40R) were fixed and LDs were stained with LipidTOX reagent (red), and imaged on a confocal microscope. Note the diffuse staining pattern of EGFP-Tubulin-WT and increased LD staining at a late stage of differentiation. In contrast, the majority of EGFP-Tubulin-K40R expressing cells retained a fibroblast-like morphology and relatively intact MT network. Scale bars = 10  $\mu$ m.

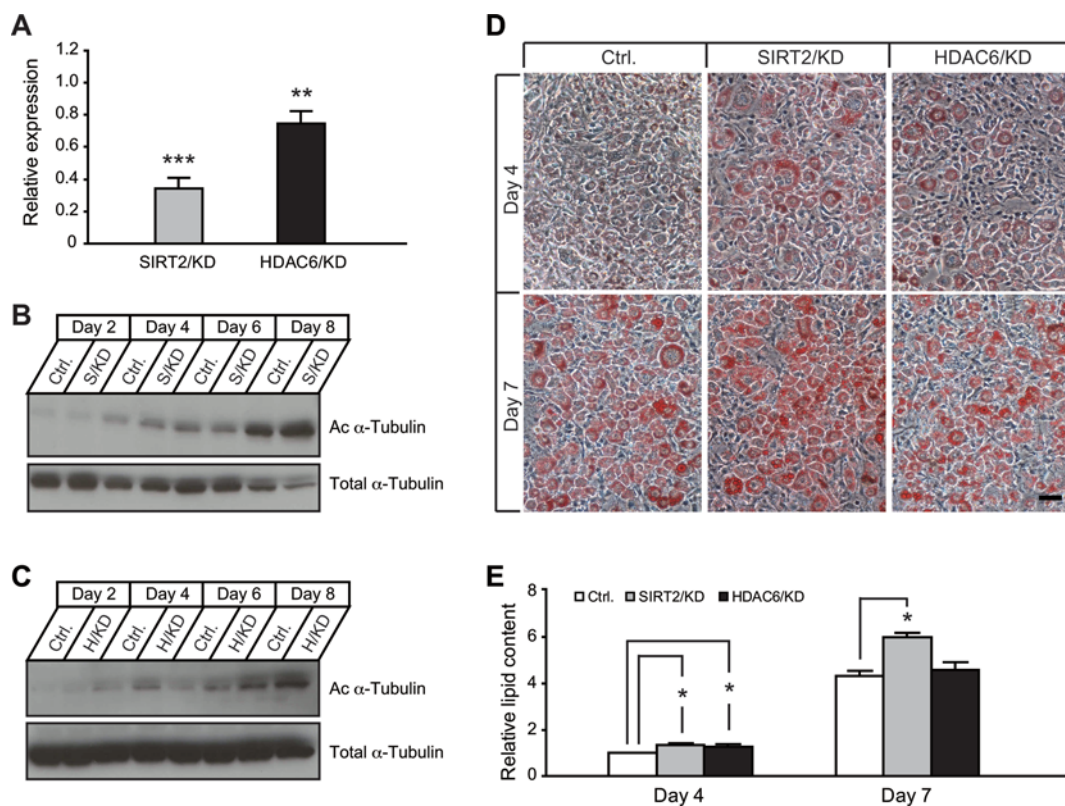

**Figure S5 Enhanced adipogenesis in SIRT2- or HDAC6-KD cells is associated with increased acetylation of  $\alpha$ -tubulin**

(A) 3T3-L1 cells with efficient KD of SIRT2 or HDAC6. (B and C) The levels of acetylated  $\alpha$ -tubulin were detected in SIRT2- (B) or HDAC6- (C) KD cells at different time points after adipogenic cocktail treatment. (D) Stable 3T3-L1 cells with KD of SIRT2 or HDAC6 were stained with Oil-Red O and imaged on a microscope at days 4 and 7 after adipogenic cocktail treatment. Note both cell lines showed increased Oil-Red O staining at day 4, but only SIRT2-KD cells showed more staining at day 7. (E) Propan-2-ol extracts of Oil-Red O cells from (D) were used to determine the relative lipid content. As was found in (D), lipid content was increased in both cell lines at day 4, but only SIRT2-KD cells showed increased lipid content at day 7. Values are means  $\pm$  S.E.M. ( $n = 3-4$  independent experiments). \* $P < 0.05$ , \*\* $P < 0.01$  and \*\*\* $P < 0.001$ . Scale bar in (D) = 50  $\mu$ m. Ctrl., control.

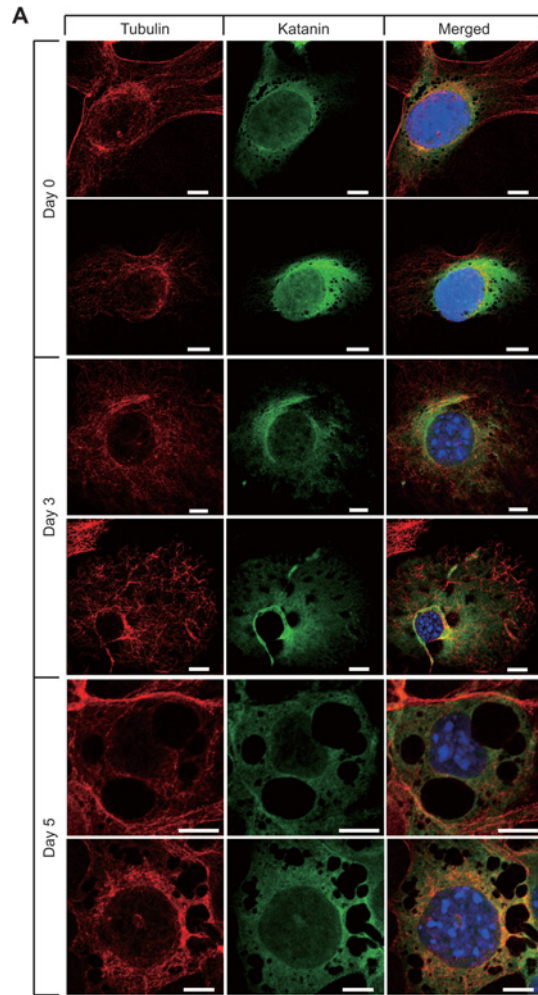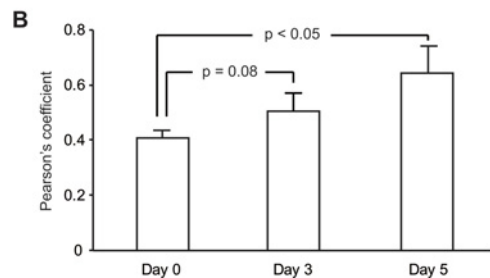

**Figure S6 Increased co-localization of katanin with  $\alpha$ -tubulin during adipogenesis**

(A) 3T3-L1 cells expressing EGFP-tagged katanin were fixed, stained with the anti-tubulin antibody at days 0, 3 and 5 after adipogenic cocktail treatment, and imaged on a confocal microscope. Scale bars = 10  $\mu$ m. (B) Pearson's coefficients at the time points indicated. Values are means  $\pm$  S.E.M. ( $n = 3-4$  independent experiments).

**Table S1 Target sequences for KD of MEC-17, SIRT2, HDAC6 and katanin**

| Target  | Oligonucleotide name | Sequence (5' $\rightarrow$ 3') |
|---------|----------------------|--------------------------------|
| MEC-17  | M/KD1                | GCCATACTCTCCAGTGAC             |
| MEC-17  | M/KD2                | AGTTGGATACAAGAAGCTC            |
| SIRT2   | S/KD                 | GAAGGAGTGACACGCTACA            |
| HDAC6   | H/KD                 | GGGCTGGATCTGAACCCTG            |
| Katanin | K/KD1                | GCAGTGGTGTACCAATGT             |
| Katanin | K/KD2                | GACAACGTTCTTCAATGTC            |

**Table S2 Real-time qPCR primers**

aP2, adipocyte P2; GLUT4, glucose transporter 4; LDLR, low-density lipoprotein receptor; TBP, TATA-box binding protein.

| Target         | Forward primer (5' $\rightarrow$ 3') | Reverse primer (5' $\rightarrow$ 3') |
|----------------|--------------------------------------|--------------------------------------|
| MEC-17         | GAGCCATTATTGGTTCTCAAAG               | AGCCTCCCGGTCATCCA                    |
| SIRT2          | AGCCAACCATCTGCCACTAC                 | CCAGCCCATCGTGATTCTT                  |
| HDAC6          | GACAGCGAAAGAGTAGGCACAA               | AGGTGGCGCTGGATTCC                    |
| Katanin        | GCCAGCCGAAGGATGAAA                   | GCACCTCCAACCATCCAT                   |
| PPAR $\gamma$  | CATGACCAGGGAGTTCCTCAA                | AGCAAACCTCAAACCTAGGCTCCAT            |
| C/EBP $\alpha$ | CCAAGAAGTCGGTGGACAAGA                | CGGTCATTGCACTGGTCAACT                |
| GLUT4          | GTGACTGGAACACTGGTCCTA                | CCAGCCACGTTGCATTGTAG                 |
| Perilipin A    | GGGACCTGTGAGTGCTTCC                  | GTATTGAAGAGCCGGGATCTTTT              |
| aP2            | GCCAAGCCCAACATGATCA                  | TTCCACGCCAGTTTGAAG                   |
| LDLR           | CCACTTCGCTGCAACTCA                   | CGTCGCAGGCCCAAG                      |
| TBP            | ACCCTTCAACCAATGACTCTATG              | TGACTGCAGCAAAATCGCTTGG               |
